# Supplementary material
Source: PubMed Central journal article supplement (PMC6312003)
Supplement: 2018_199885-Disclosures_and_Contributions.pdf [file 2018_199885-Disclosures_and_Contributions.pdf]

Haematologica  
HAEMATOL/2018/199885  
Version 3

B-lymphoblastic lymphoma with the TCF3-PBX1 fusion gene

Mari Kubota-Tanaka, Tomoo Osumi, Shouko Miura, Hiroshi Tsujimoto, Toshihiko Imamura, Akira Nishimura, Kentaro Oki, Kozue Nakamura, Satoshi Miyamoto, Kento Inoue, Maiko Inoue, Takahiro Kamiya, Masakatsu Yanagimachi, Tsubasa Okano, Noriko Mitsuiki, Takeshi Isoda, Kohsuke Imai, Hirokazu Kanegane, Tomohiro Morio, Shinji Kounami, Mikiya Endo, Motohiro Kato, and Masatoshi Takagi

Disclosures: Authors disclose no conflict of interest. This work is supported by the operating cost of the Department of Pediatrics and Developmental Biology, Tokyo Medical and Dental University.

Contributions: MK, TO, SM, HT, TI, KN, SM, KI, MI, TK, MY, TO, NM and TI contributed patient's care and collected clinical information. KI, HK, TM, SK, ME, MK and KO supervised patient's care and organized data collection. AN performed FISH analysis. KO performed transcriptome analysis. MT designed the study and wrote a manuscript.
